# Supplementary material for: A dataset on the structural diversity of European forests
Source: Copernicus journal article supplement (doi:10.5194/essd-2024-471), 2025-01-20
Supplement: Supplementary file 1 [file essd-2024-471-supplement.pdf]

Table S1. Criteria used for filtering GEDI data

| Description                                                                   | Justification                                                                                                                                        |
|-------------------------------------------------------------------------------|------------------------------------------------------------------------------------------------------------------------------------------------------|
| Dropped the points with <code>quality_flag = 0</code>                         | Guarantees good waveform quality                                                                                                                     |
| Observations limited to nighttime (solar elevation $\leq 0$ degrees)          | Mitigates influence of background noise from reflected solar radiation                                                                               |
| Dropped the points with <code>degrade_flag = 0</code>                         | Avoids potential geolocation errors under suboptimal conditions                                                                                      |
| Dropped the points with footprint slope $> 20$ degrees                        | Prevents inaccuracies in vegetation height on steep terrain. Slope is determined by the Shuttle Radar Topography Mission (SRTM) data (see GEE code). |
| Dropped the points with <code>urban_proportion &gt; 5%</code>                 | Focuses on non-urbanized forest settings                                                                                                             |
| Dropped the points with <code>landsat_water_persistence = 0</code>            | Eliminates areas with consistent water coverage                                                                                                      |
| Dropped the points with <code>landsat_tree_cover &lt; 10%</code>              | Confirms significant forest canopy presence                                                                                                          |
| Dropped the points with <code>rh98 &gt; 100 m</code>                          | Maintains focus on typical forest canopy heights, avoiding outliers                                                                                  |
| Dropped the points with <code>rh50 <math>\leq 0</math> m</code>               | Confirms presence of vertical structure in vegetation                                                                                                |
| Dropped the points with <code>total canopy cover <math>\leq 0.1</math></code> | Indicates significant presence of canopy materials                                                                                                   |
| Dropped the points with <code>leaf-off_flag <math>\neq 0</math></code>        | Ensures data represents vegetation during growing season, avoiding underestimation of structural complexity in deciduous trees                       |
| Dropped the points with <code>num_detectedmodes = 0</code>                    | A signal without modes is indicative of pure noise, lacking information on forest vertical structure                                                 |
| Dropped the points with <code>surface_flag = 0</code>                         | Ensures presence of ground returns in waveform, essential for accurate vertical structure determination                                              |
| Dropped the points with <code>sensitivity &lt; 0.95</code>                    | Provides high confidence in proper representation of forest's vertical structure                                                                     |

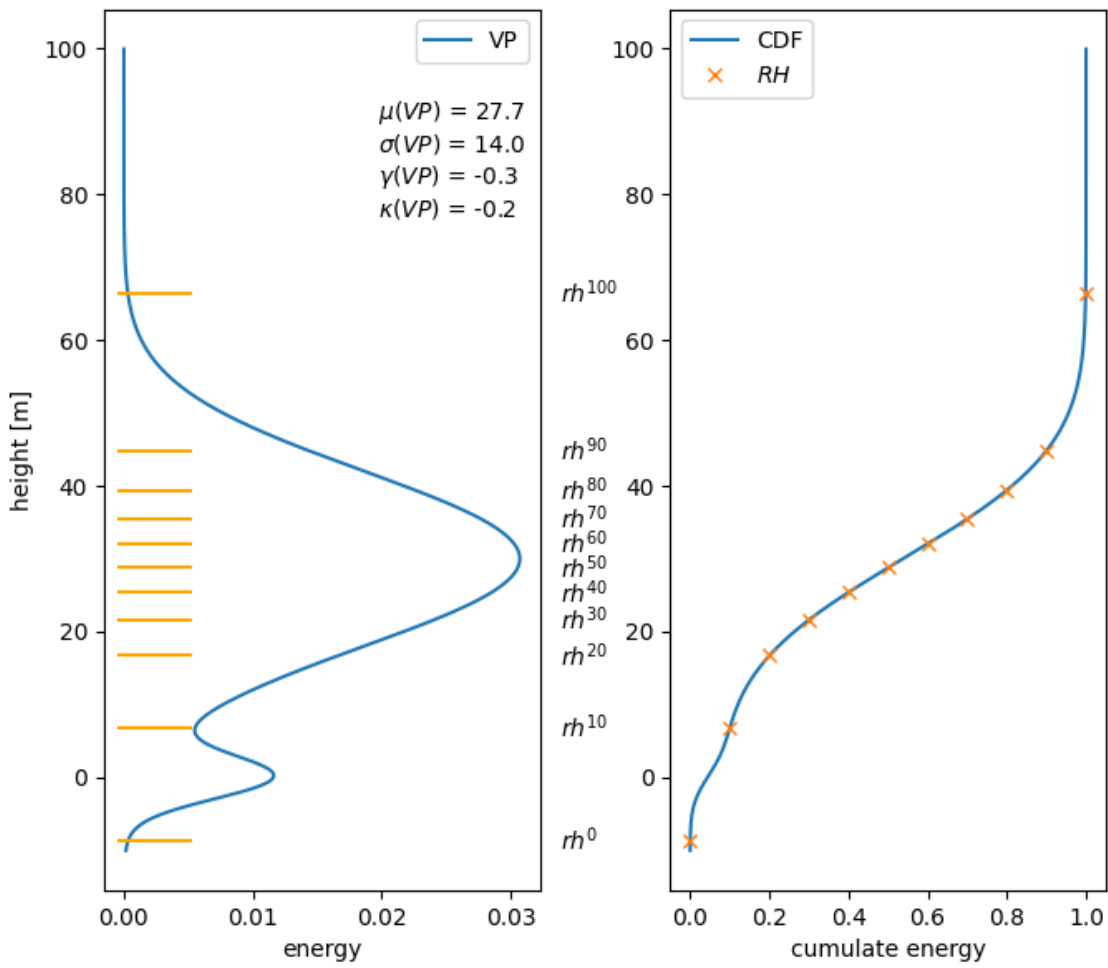

Figure S1. Vegetation vertical profile (denoted as VP) as detected by GEDI waveform (left panel). The numbers within the first panel indicate the four moments (for notation see Appendix A1 main text). The second panel shows the corresponding cumulative distribution function (CDF) of the relative heights (RH) (right panel).

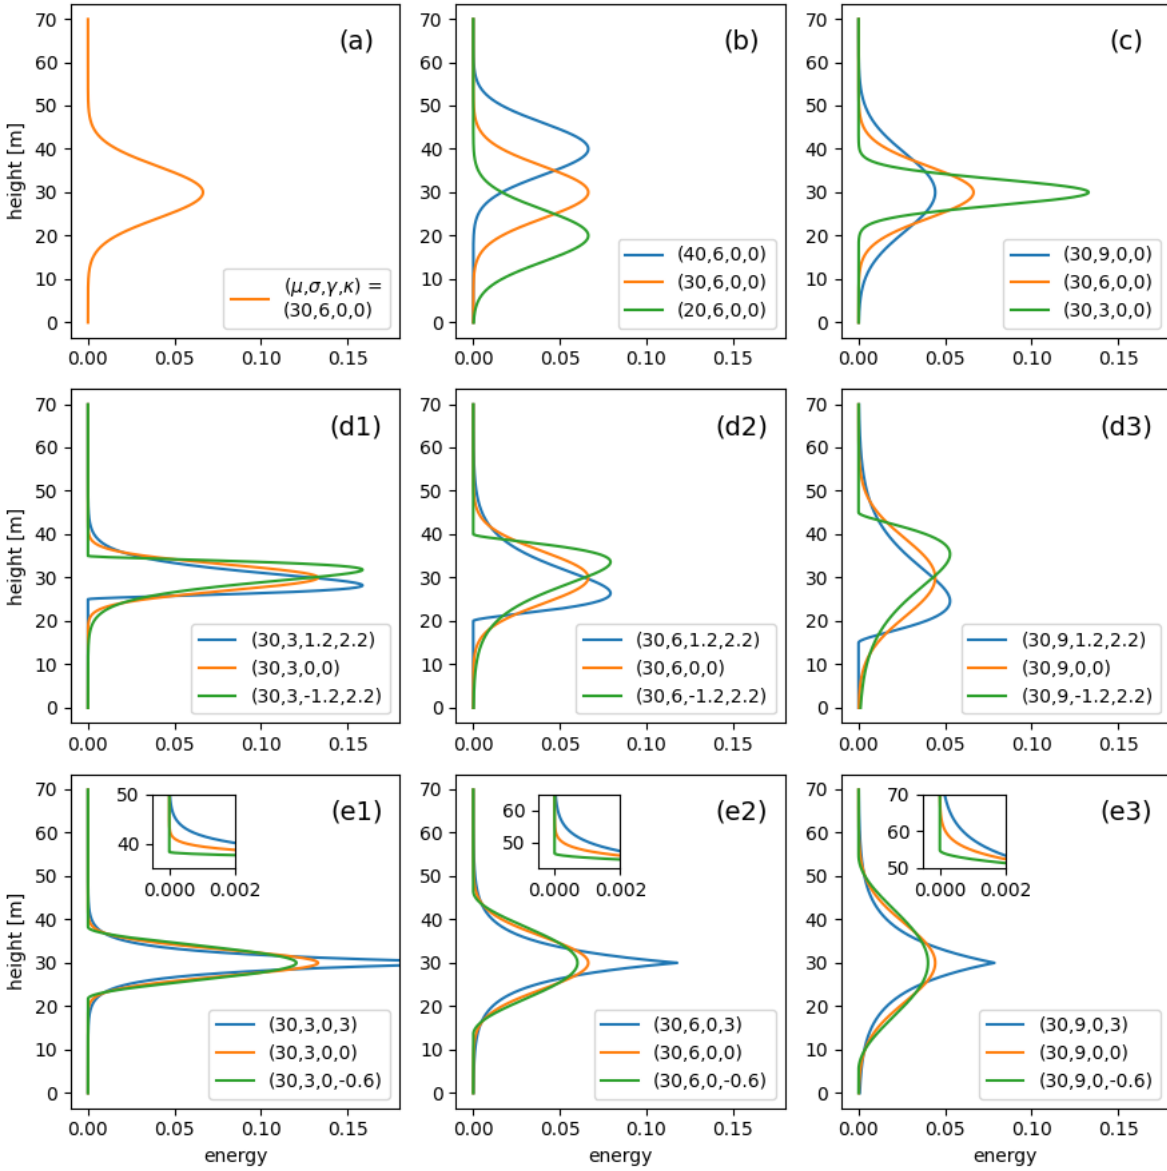

Figure S2. Examples of different unimodal vertical profiles and their relative moments  $\mu$ ,  $\sigma$ ,  $\gamma$ ,  $\kappa$ . Panel (a):  $\mu = 30$ ,  $\sigma = 6$ ,  $\gamma = 0$ , and  $\kappa = 0$  (i.e. normal distribution). Panel (b): variation of  $\mu$  (20, 30, 40 m) with fixed  $\sigma$  (6 m), fixed  $\gamma$  (0), and fixed  $\kappa$  (0). Panel (c): variation of  $\sigma$  (3, 6, 9 m) with fixed  $\mu$  (30), fixed  $\gamma$  (0), and fixed  $\kappa$  (0). Panels d: variation of  $\gamma$  (-1.2, 0, 1.2) with fixed  $\mu$  (30 m), fixed  $\kappa$  (2.2), and  $\sigma$  equal 3 m (panel d1), 6 m (panel d2), and 9 m (panel d3). Panels e: variation of  $\kappa$  (-0.6, 0, 3) with fixed  $\mu$  (30 m), fixed  $\gamma$  (0), and  $\sigma$  equal 3 m (panel e1), 6 m (panel e2), and 9 m (panel e3).

Table S2. List of the remote sensing predictors used for Random Forest Modelling.  $\beta = SM$  stands for spatial mean.  $\beta = ASM, ENT, DISS$  stands for the texture metrics Angular Second Moment (ASM), entropy (ENT), and dissimilarity (DISS) index, respectively, see Section 1 in the main text for more details. S1, S2, and AP2 stands for Sentinel-1, Sentinel-2 and AIOS-PULSAR-2, respectively.

| Predictor                                                  | Description                                               | $\beta$            | Composite | SRS |
|------------------------------------------------------------|-----------------------------------------------------------|--------------------|-----------|-----|
| $\phi_{S1VVgs\mu}^{\beta}, \phi_{S1VHgs\mu}^{\beta}$       | Growing season VV and VH mean                             | SM, ASM, ENT, DISS | Six-month | S1  |
| $\phi_{S1VVgs\sigma}^{\beta}, \phi_{S1VHgs\sigma}^{\beta}$ | Growing season VV and VH standard deviation               | SM                 | Two-month |     |
| $\phi_{S1VVpre\mu}^{\beta}, \phi_{S1VHpre\mu}^{\beta}$     | Pre-peak growing season mean                              | SM                 | Two-month |     |
| $\phi_{S1VVact\mu}^{\beta}, \phi_{S1VHact\mu}^{\beta}$     | Peak growing season mean                                  | SM                 | Two-month |     |
| $\phi_{S1VVpost\mu}^{\beta}, \phi_{S1VHpost\mu}^{\beta}$   | Post-peak growing season mean                             | SM                 | Two-month |     |
| $\phi_{CO}^{\beta}$                                        | Coherence 12 days summer                                  | SM                 | Summer    |     |
| $\phi_{AP2HH}^{\beta}, \phi_{AP2HV}^{\beta}$               | Annual HH and HV                                          | SM, ASM, ENT, DISS | Annual    | AP2 |
| $\phi_{NDVI}^{\beta}$                                      | Normalized difference vegetation index                    | SM, ASM, ENT, DISS | Six-month | S2  |
| $\phi_{NDVI\sigma}^{\beta}$                                | Normalized difference vegetation index standard deviation | SM                 | Six-month |     |
| $\phi_{NDWI}^{\beta}$                                      | Normalized difference water index                         | SM, ASM, ENT, DISS | Six-month |     |
| $\phi_{NDRE}^{\beta}$                                      | Normalized difference red edge index                      | SM, ASM, ENT, DISS | Six-month |     |
| $\phi_{MSAVI}^{\beta}$                                     | Modified soil adjusted vegetation index                   | SM, ASM, ENT, DISS | Six-month |     |
| $\phi_{GNDVI}^{\beta}$                                     | Green normalized vegetation index                         | SM, ASM, ENT, DISS | Six-month |     |

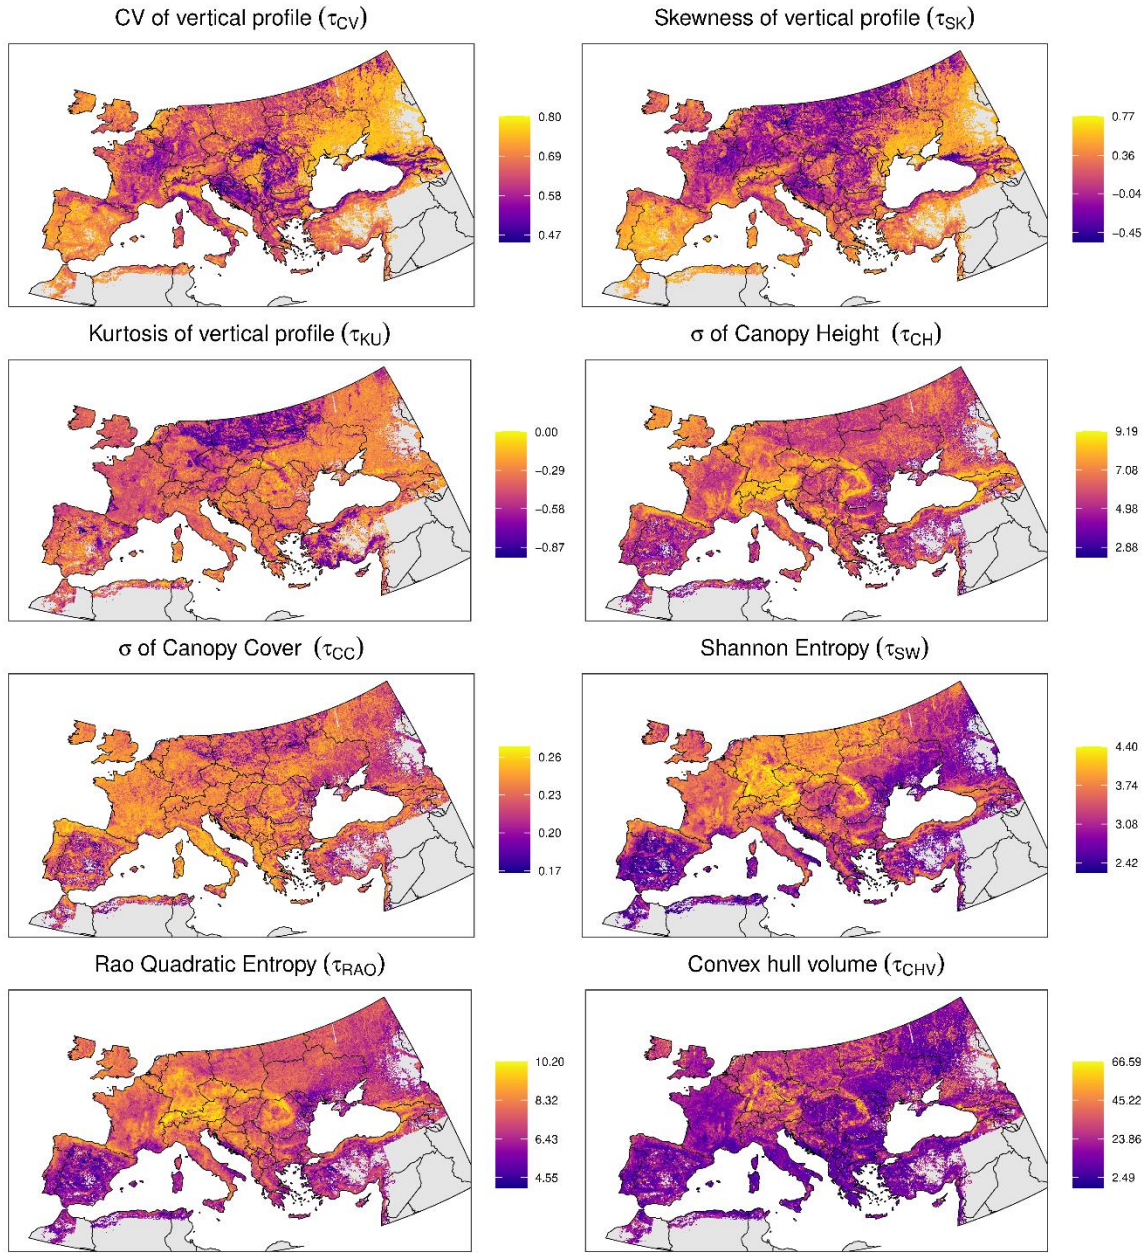

Figure S3 Predicted structural diversity at a 5 km resolution, derived from the Random Forest modelling. Each panel illustrates the geographic distribution of a specific metric (see methods for metric details). The colour palette transitions from purple to yellow, denote an increasing gradient of structural diversity, with warmer colours signifying higher values.

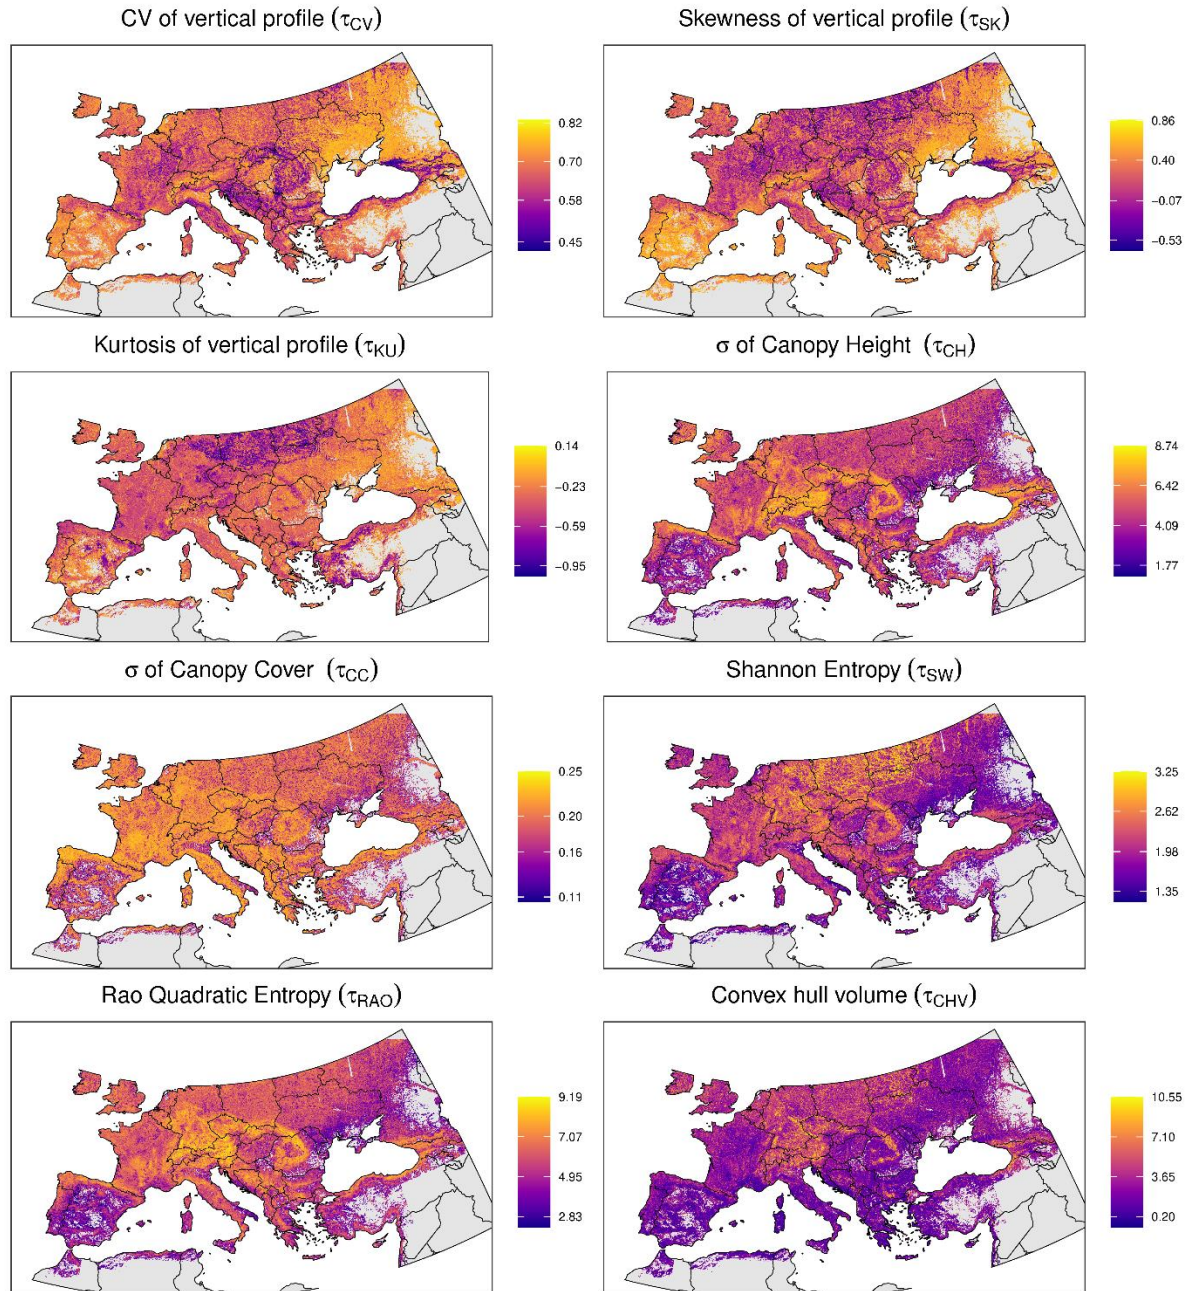

Figure S4 Predicted structural diversity at a 1 km resolution, derived from the Random Forest modelling. Each panel illustrates the geographic distribution of a specific metric (see methods for metric details). The colour palette transitions from purple to yellow, denote an increasing gradient of structural diversity, with warmer colours signifying higher values.

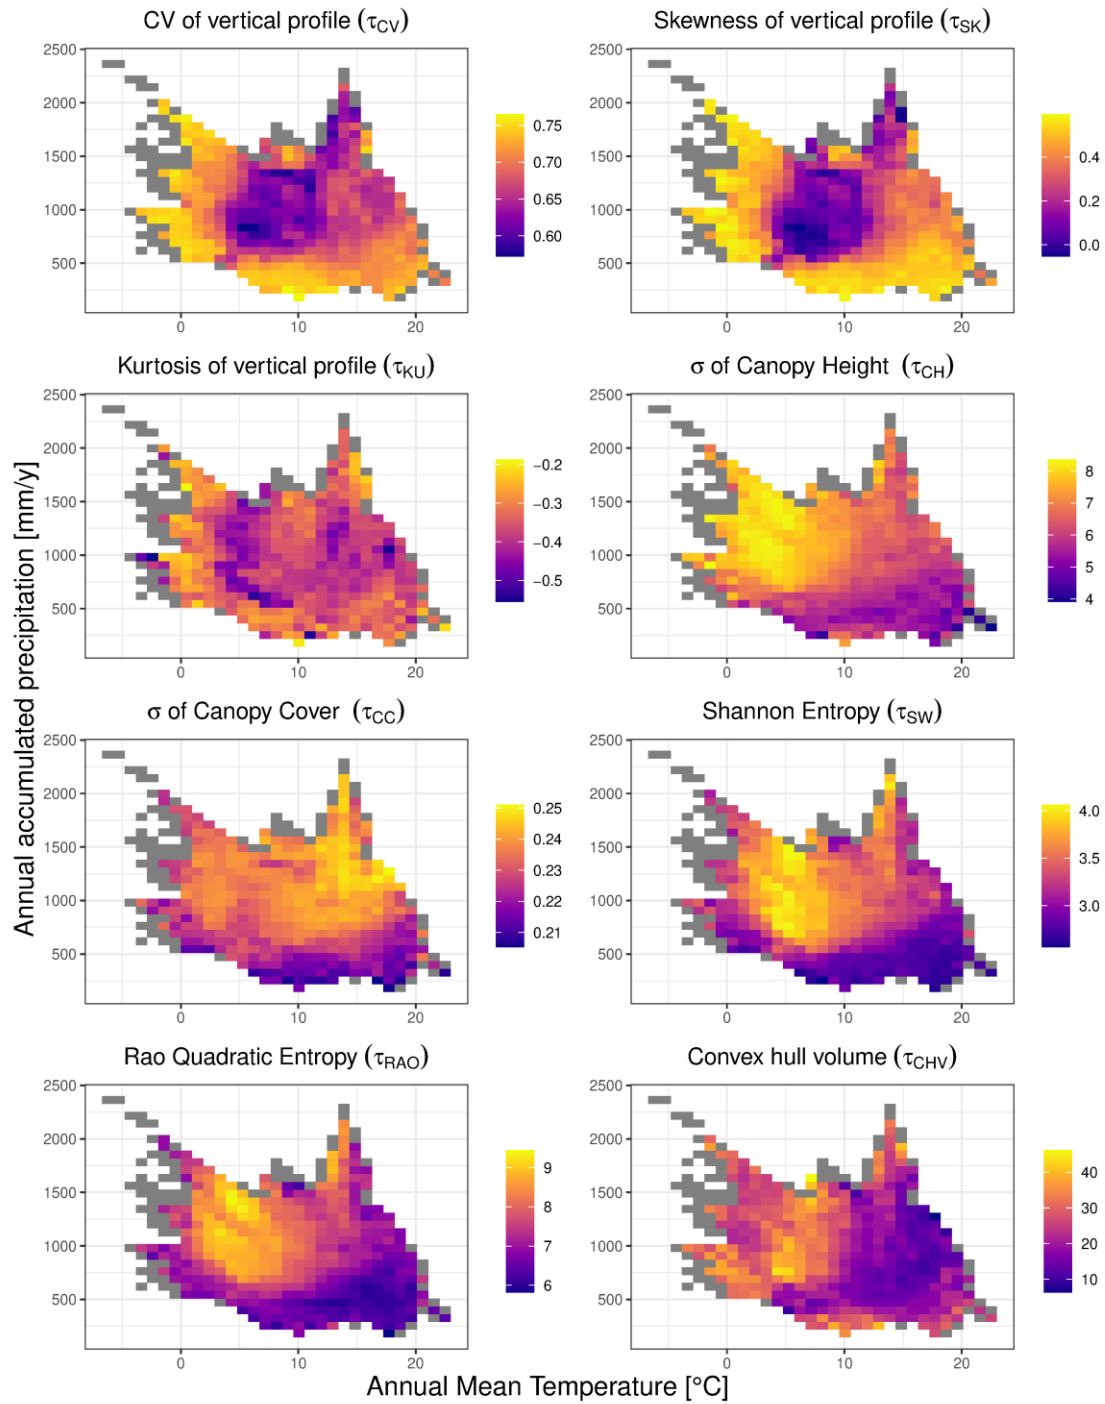

Fig. S5 Predicted structural diversity variables in climate coordinates. The results refer to the dataset at 5 km resolution.

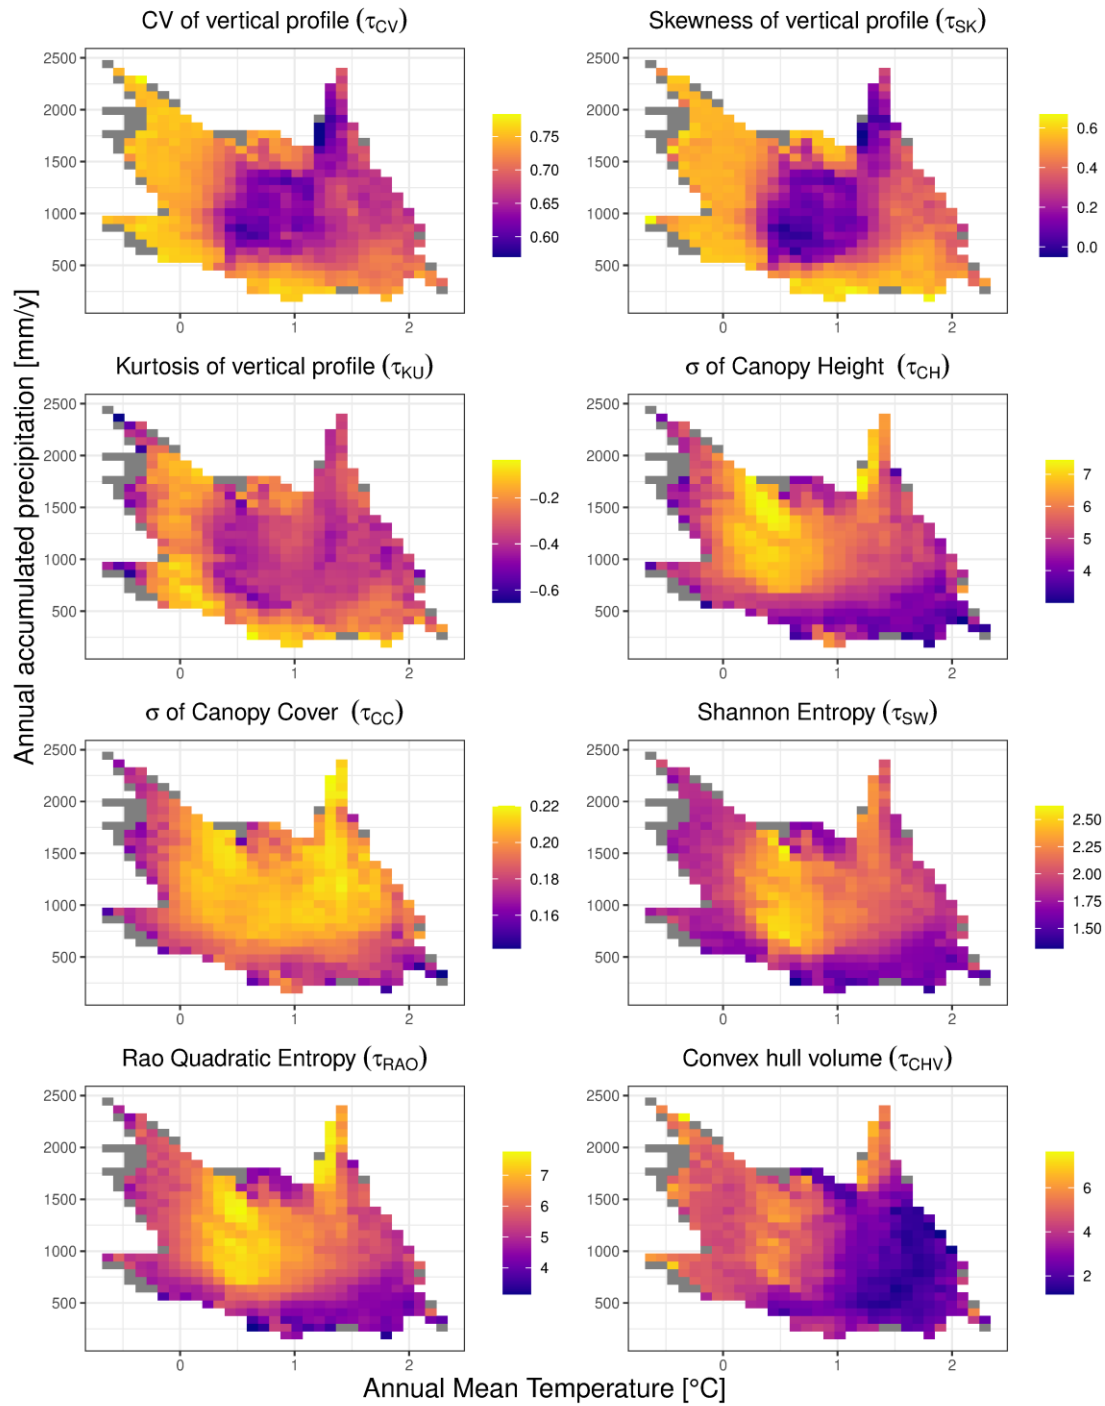

Fig. S6 Predicted structural diversity variables in climate coordinates. The results refer to the dataset at 1 km resolution.



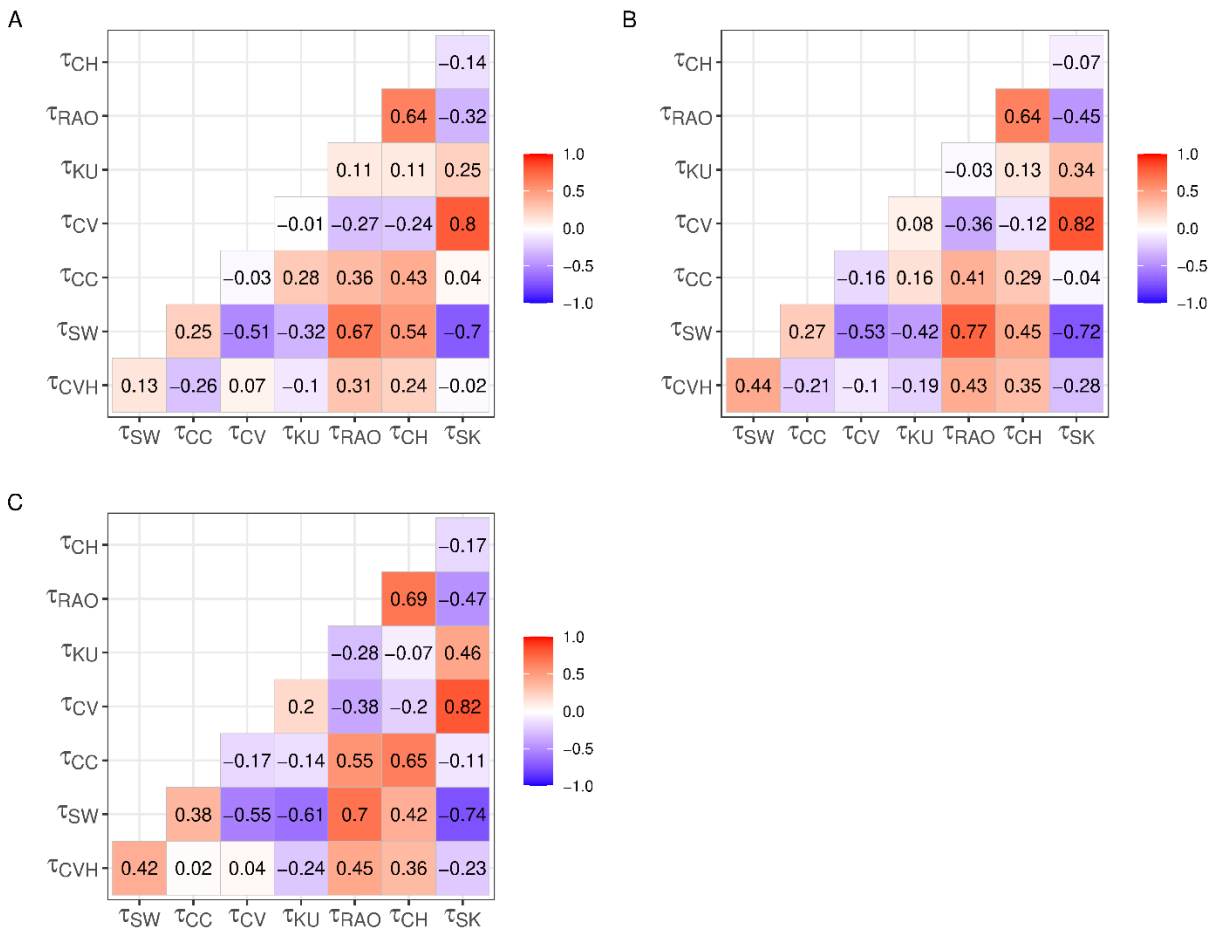

Figure. S7 Pairwise correlations for predicted structural diversity indices. Panel A shows the correlations among indices predicted at a 10 km x 10km resolution, Panel B at a 5km x 5km resolution, and Panel C a 1km x 1km. Each heatmap visualises the interrelationships of structural diversity indices derived from the Random Forest model, highlighting variations across resolutions.

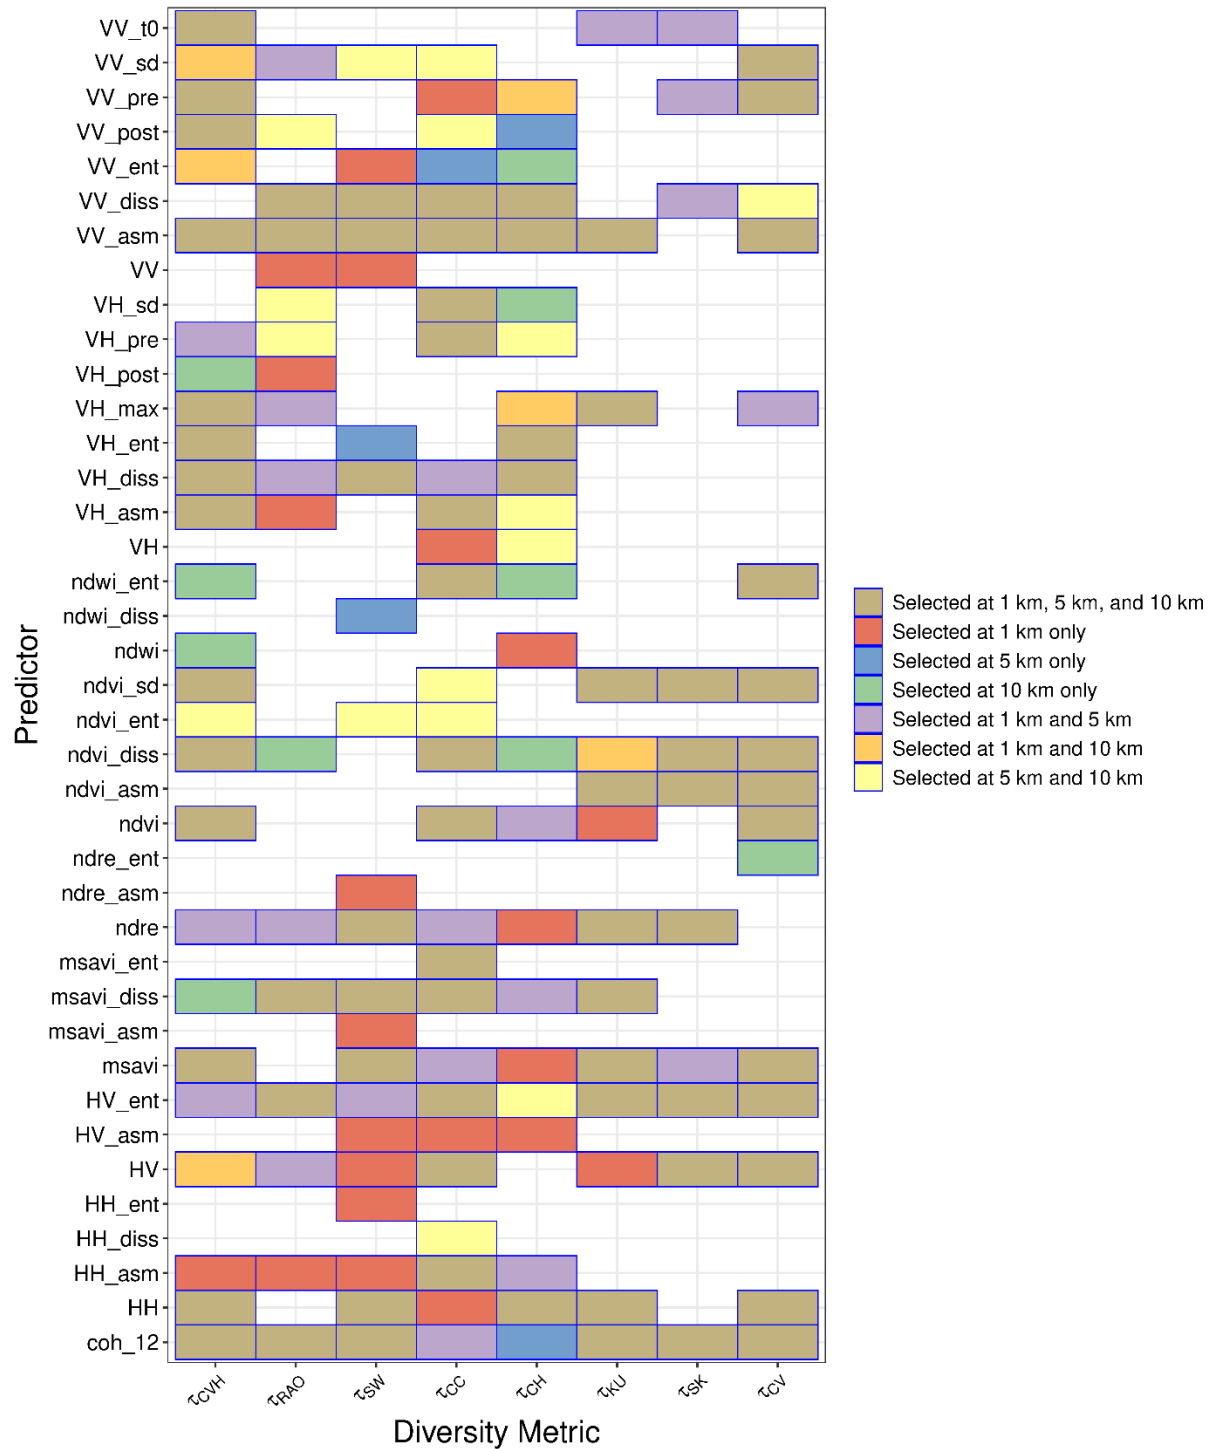

Figure S8 Summary of model selection results using 47 predictors as input variables for models fitted to 8 diversity metrics at different resolutions (1 km, 5 km, 10 km). The y-axis shows the predictors, and the x-axis shows the diversity metrics. Colours indicate whether a specific predictor was selected at one or more resolutions.

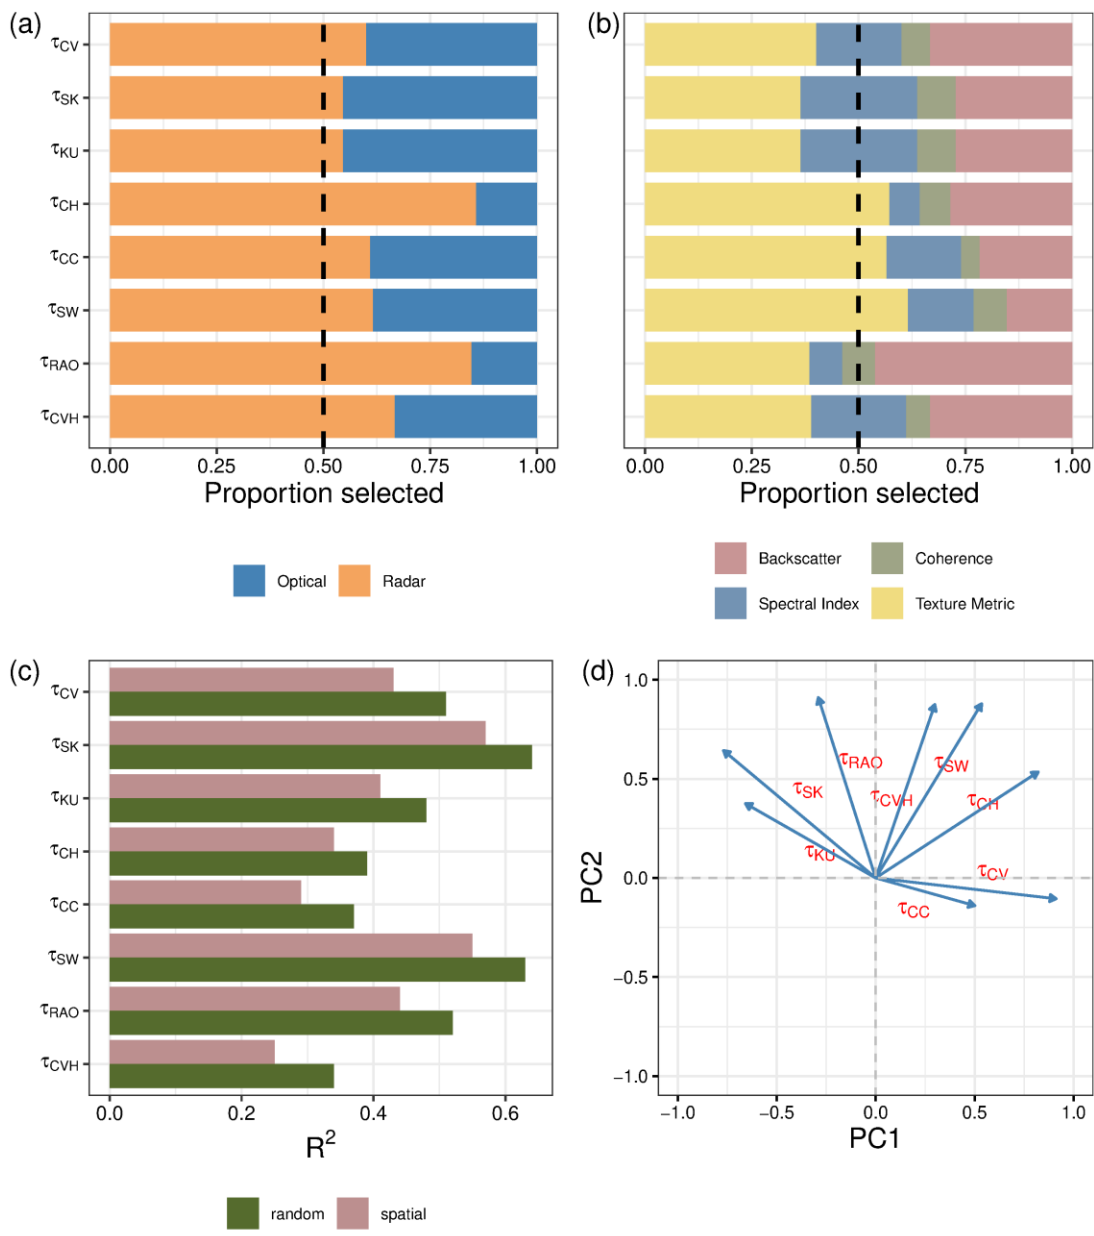

Figure S9. Results from the random forest modelling exercise at 5 km resolution. Panels display the variable selection frequencies (A and B) and model performance, as indicated by the  $R^2$  values derived from two types of validation methods (C). Panel D shows the results of the Principal Component Analysis (PCA) conducted on the predicted metrics at this resolution.

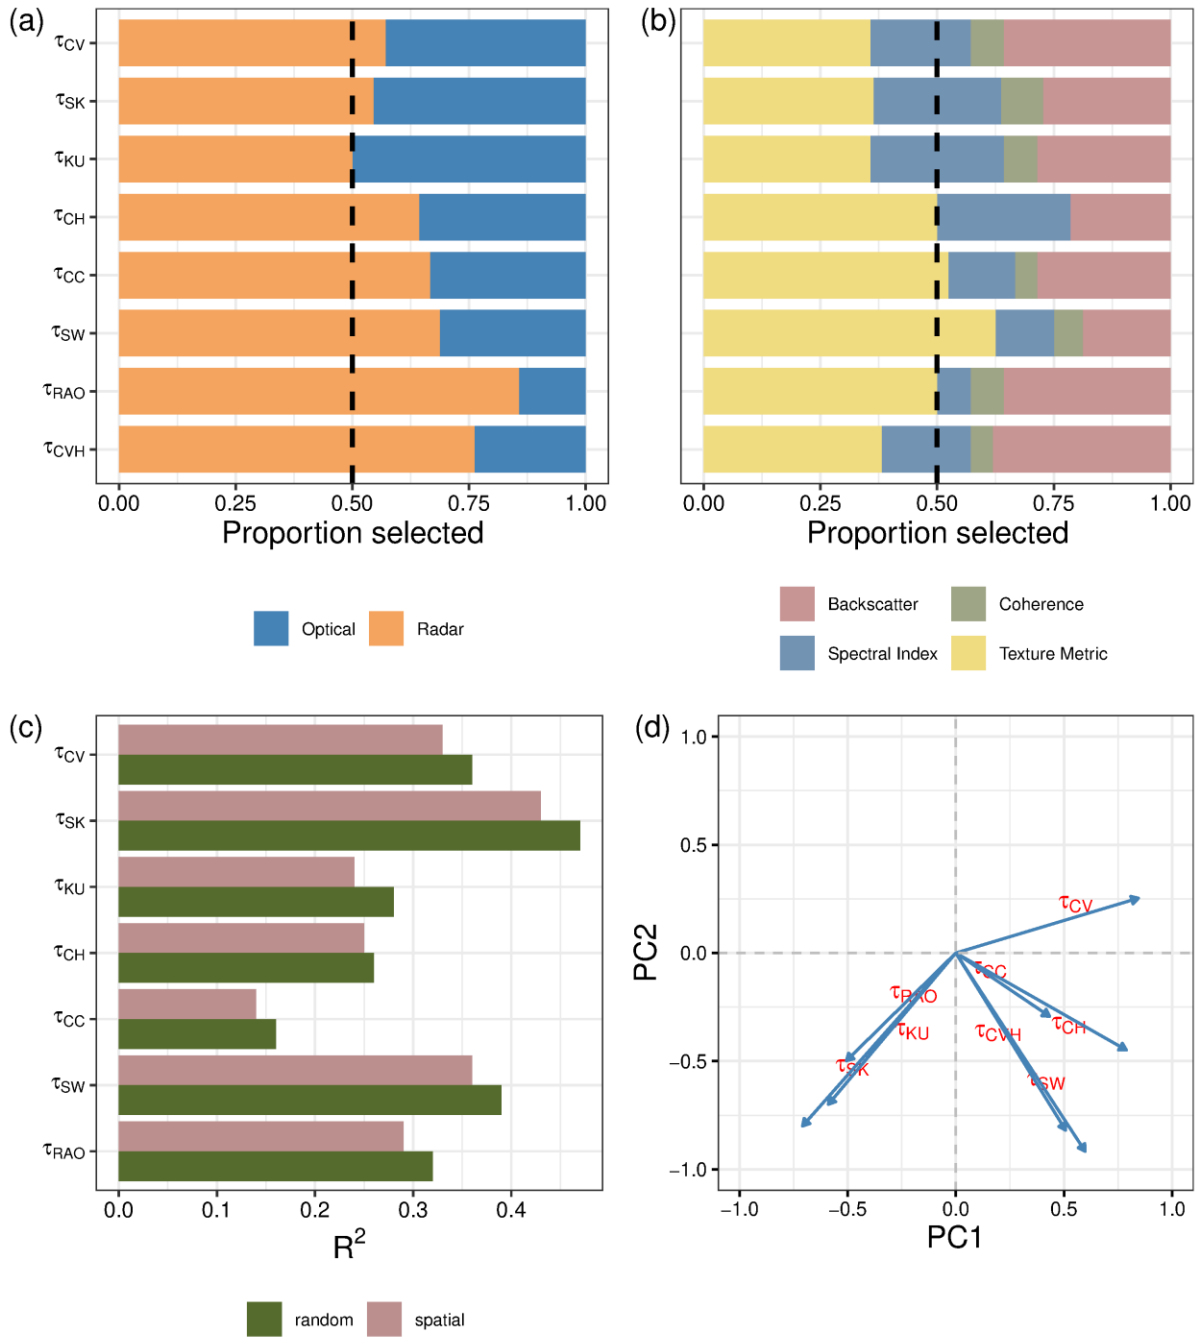

Figure S10 Results from the random forest modelling exercise at 1 km resolution. Panels display the variable selection frequencies (A and B) and model performance, as indicated by the  $R^2$  values derived from two types of validation methods (C). Panel D shows the results of the Principal Component Analysis (PCA) conducted on the predicted metrics at this resolution.

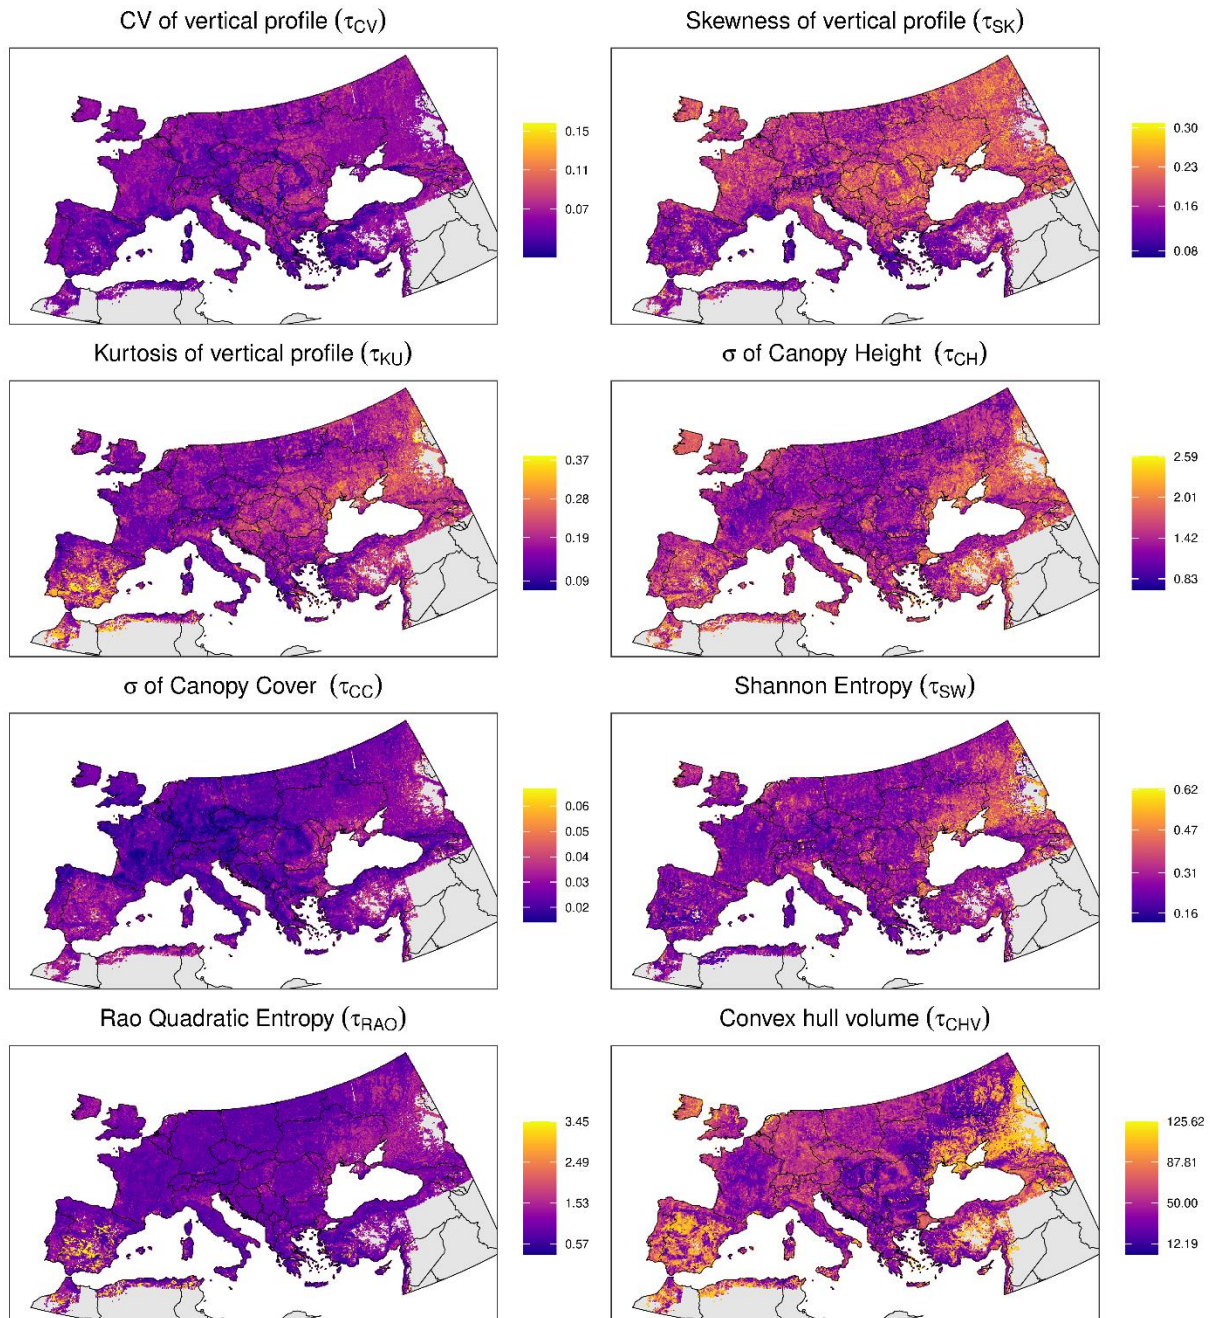

Figure S11. Standard errors of predictions for models trained at 10 km resolution using Random Forest modelling. These errors were calculated using the infinitesimal jackknife method (see Methods for details). The colour palette transitions from purple to yellow, denoting increasing standard error, with warmer colours signifying higher values.

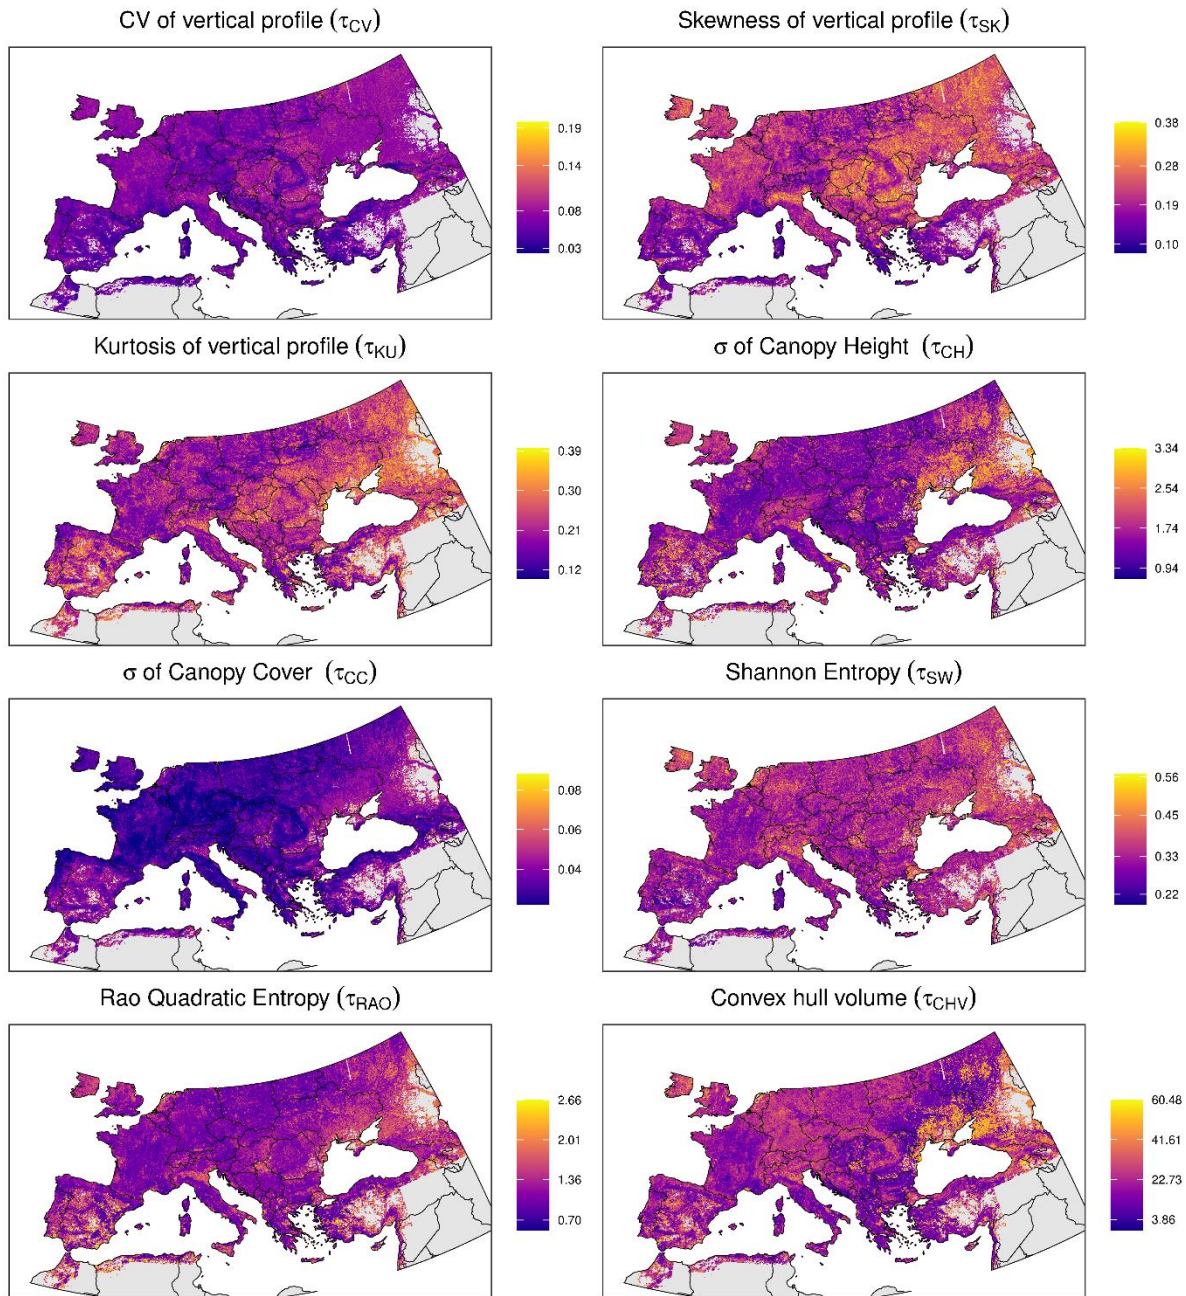

Figure S12 Standard errors of predictions for models trained at 5 km resolution using Random Forest modelling. These errors were calculated using the infinitesimal jackknife method (see Methods for details). The colour palette transitions from purple to yellow, denoting increasing standard error, with warmer colours signifying higher values.

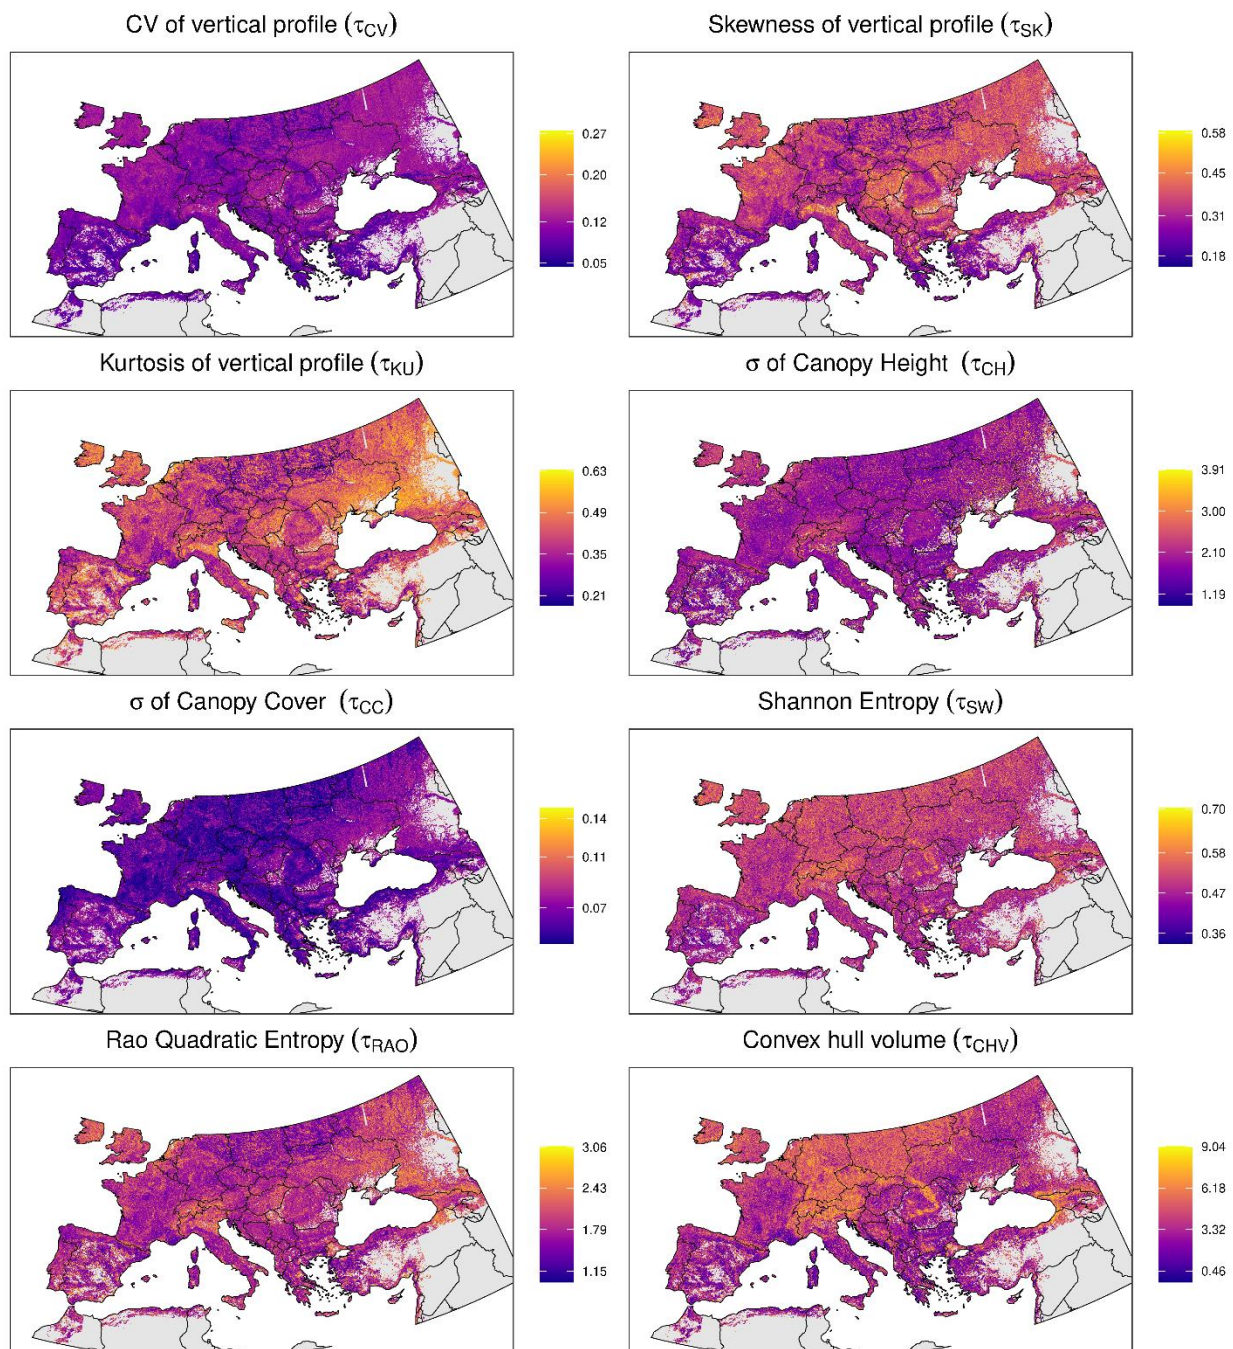

Figure S13 Standard errors of predictions for models trained at 1 km resolution using Random Forest modelling. These errors were calculated using the infinitesimal jackknife method (see Methods for details). The colour palette transitions from purple to yellow, denoting increasing standard error, with warmer colours signifying higher values.
